# Supplementary material
Source: PubMed Central journal article supplement (PMC3796343)
Supplement: jn.113.180588_nutrition180588SupplementaryData1.pdf [file jn.113.180588_nutrition180588SupplementaryData1.pdf]

## ONLINE SUPPORTING MATERIAL

**Supplemental Table 1.** Analytes and their mass-to-charge ( $m/z$ ) transitions employed in selected reaction monitoring (SRM) for the LC-MS/MS determination of 16 constituents of one-carbon metabolism and related processes. Also shown are their respective stable isotope labeled internal standards.

|                                                        | Precursor<br>( $m/z$ ) | Product<br>( $m/z$ ) |
|--------------------------------------------------------|------------------------|----------------------|
| Arginine                                               | 175                    | 70                   |
| [ <sup>15</sup> N <sub>2</sub> ]arginine               | 177                    | 70                   |
| Asymmetric-dimethylarginine*                           | 203                    | 70                   |
| Symmetric-dimethylarginine*                            | 203                    | 172                  |
| Betaine                                                | 118                    | 58                   |
| [d11]betaine                                           | 129                    | 66                   |
| Choline                                                | 104                    | 60                   |
| [methyl-d9]choline                                     | 113                    | 69                   |
| Creatine                                               | 132                    | 90                   |
| [methyl-d3]creatine                                    | 135                    | 93                   |
| Creatinine                                             | 114                    | 44                   |
| [methyl-d3]creatinine                                  | 117                    | 47                   |
| Dimethylglycine                                        | 104                    | 58                   |
| [methyl-d6]dimethylglycine                             | 110                    | 64                   |
| Glycine                                                | 76                     | 30                   |
| [U- <sup>13</sup> C <sub>2</sub> ]glycine              | 78                     | 31                   |
| Guanidinoacetate                                       | 118                    | 101                  |
| [2,2,-d2]guanidinoacetate                              | 120                    | 103                  |
| Methionine                                             | 150                    | 133                  |
| [U- <sup>13</sup> C <sub>5</sub> ]methionine           | 155                    | 138                  |
| Methionine sulfoxide                                   | 166                    | 74                   |
| [U- <sup>13</sup> C <sub>5</sub> ]methionine sulfoxide | 171                    | 76                   |
| Sarcosine                                              | 90                     | 44                   |
| [methyl-d3]sarcosine                                   | 93                     | 47                   |
| Serine                                                 | 106                    | 60                   |
| [U- <sup>13</sup> C <sub>3</sub> ]serine               | 109                    | 63                   |
| Threonine                                              | 120                    | 74                   |
| [2,3-d2]threonine                                      | 122                    | 76                   |
| Leucine                                                | 132                    | 86                   |
| [5,5,5-d3]leucine                                      | 135                    | 89                   |

\*[<sup>15</sup>N<sub>2</sub>]arginine was used as internal standard for symmetric- and asymmetric-dimethylarginine.
